# Repeated colonization of caves leads to phenotypic convergence in catfishes (Siluriformes: *Trichomycterus*) at a small geographical scale

JUAN SEBASTIÁN FLÓREZ<sup>1</sup>, CARLOS DANIEL CADENA<sup>2</sup>, CARLOS DONASCIMIENTO<sup>3</sup> and MAURICIO TORRES<sup>1,\*</sup>

<sup>1</sup>*Escuela de Biología, Universidad Industrial de Santander, Bucaramanga, Colombia*

<sup>2</sup>*Departamento de Ciencias Biológicas, Universidad de los Andes, Bogotá, Colombia*

<sup>3</sup>*Colecciones Biológicas, Instituto de Investigación de Recursos Biológicos Alexander von Humboldt, Villa de Leyva, Colombia*

Received 26 February 2020; revised 3 August 2020; accepted for publication 23 October 2020

Across various animal groups, adaptation to the challenging conditions of cave environments has resulted in convergent evolution. We document a Neotropical cavefish system with ample potential to study questions related to convergent adaptation to cave environments at the population level. In the karstic region of the Andes of Santander, Colombia, cave-dwelling catfish in the genus *Trichomycterus* exhibit variable levels of reduction of eyes and body pigmentation relative to surface congeners. We tested whether cave-dwelling, eye-reduced, depigmented *Trichomycterus* from separate caves in Santander were the result of a single event of cave colonization and subsequent dispersal, or of multiple colonizations to caves by surface ancestors followed by phenotypic convergence. Using mitochondrial DNA sequences to reconstruct phylogenetic relationships, we found that caves in this region have been colonized independently by two separate clades. Additional events of cave colonization – and possibly recolonization of surface streams – may have occurred in one of the clades, where surface and cave-dwelling populations exhibit shallow differentiation, suggesting recent divergence or divergence with gene flow. We also identify potentially undescribed species and likely problems with the circumscription of named taxa. The system appears promising for studies on a wide range of ecological and evolutionary questions.

ADDITIONAL KEYWORDS: adaptation – Andes – freshwater fishes – Neotropics – phylogeny – taxonomy.

## INTRODUCTION

Animals living in caves have long been of interest in the study of adaptation by natural selection and evolutionary convergence (Juan *et al.*, 2010). Across various groups – including insects in different orders (Barr, 1962; Vidlicka *et al.*, 2003; Espinasa & Fisher, 2006), arachnids (Chamberlin & Malcolm, 1960; Lourenco & Pham, 2010; Arnedo *et al.*, 2008), crustaceans (Banta, 2001; Messana *et al.*, 2002; Campos, 2017) and several vertebrates (Wiens *et al.*, 2003) – adaptation to the particularly challenging conditions of cave environments has resulted in multiple instances of convergent evolution, involving

a variety of morphological, physiological and behavioral traits (Jeffery, 2001; Protas *et al.*, 2011; Romero, 2011; Christiansen, 2012). Some of the most striking examples of convergent evolution are found in cave-dwelling fish of various distantly related lineages, which have consistently lost eyes and body pigmentation in comparison to their surface-living relatives (Proudlove, 2010; Borowsky, 2018; Niemiller *et al.* 2019).

Convergent evolution resulting from adaptation to cave environments has also been observed at the population level in fish, with a notable example being the Mexican tetra, *Astyanax mexicanus* (De Filippi, 1853), a well-studied taxon in which polyphyletic cave populations have reduced eyes and pigmentation, and unique aspects of metabolism and behaviour, compared to closely related surface populations

\*Corresponding author. Current address: Fundación Iguaque, Bucaramanga, Colombia. E-mail: mauriciotorres@iguaque.org

of the same species (Espinasa & Borowsky, 2001; Yoshizawa *et al.*, 2010; Kowalko *et al.*, 2013; Moran *et al.*, 2015; Riddle *et al.*, 2018). Despite their striking phenotypic differences, surface and cave populations of *A. mexicanus* are connected by gene flow, suggesting that divergence in cave specialists has been driven and maintained by selection counteracting the homogenizing effects of migration (Bradic *et al.*, 2012; Herman *et al.*, 2018). The Mexican tetra has emerged as a model system to study the genetic and epigenetic basis of adaptation (Jeffery, 2001, 2009; Gross, 2012; Rohner *et al.*, 2013; Gross *et al.*, 2015; Gore *et al.*, 2018). Whether insights from the Mexican tetra system have broad applicability to other clades adapting to caves remains to be seen. We here document a Neotropical cavefish system with ample potential to study questions related to adaptation to cave environments at the population level and to more broadly test for evolutionary convergence (Blount *et al.*, 2018).

The eastern Cordillera of the Andes of Colombia harbours a vast karst limestone region with hundreds of caves, most of them in the Department of Santander (Muñoz-Saba *et al.*, 2013). Recent biological explorations of caves in this region have documented a wide diversity of animals restricted to cave environments, several of them endemic, including crabs, arachnids and fish (Villareal & García, 2016; Campos, 2017; Mesa S. *et al.*, 2018). Among the most peculiar organisms reported in these caves are seven species of catfish in the genus *Trichomycterus* Valenciennes, 1832, which coexist regionally with 12 surface species of the same genus (Ardila-Rodríguez, 2007, 2018; Castellanos-Morales *et al.*, 2011; Castellanos-Morales, 2018; Mesa S. *et al.*, 2018; Fig. 1; Table 1). Cave-dwelling species of *Trichomycterus* show a variable degree of reduction of eyes and body pigmentation relative to surface species (Fig. 2); some subterranean species are pigmented and have small eyes, whereas other species lack eyes entirely and are depigmented. Besides, the degree of eye atrophy may vary within species, among different caves (Ardila-Rodríguez, 2006; Castellanos-Morales, 2007, 2008, 2010, 2018).

Two alternative evolutionary scenarios may explain the existence of cave-dwelling *Trichomycterus* in separate caves in Santander and their phenotypic similarity involving eye atrophy and depigmentation. First, cave specialists may be the result of a single event of cave colonization, adaptation to cave environments and subsequent subterranean vicariance or dispersal leading to their currently disjunct distributions. Alternatively, multiple colonizations to caves by surface ancestors followed by evolutionary convergence towards cave-adapted phenotypes may have occurred. We here address these alternative hypotheses using a phylogenetic approach.

Previous phylogenetic studies of the family Trichomycteridae have considered only two cave species, both from Santander: *Trichomycterus sandovali* Ardila-Rodríguez, 2006 was sampled by Ochoa *et al.* (2017, 2020), whereas *T. rosablanca* Mesa S. *et al.*, 2018 was included in analyses by Mesa S. *et al.* (2018). Because in those studies each cave species was independently found to be sister to the surface species *Eremophilus mutisi* Humboldt, 1805, *T. sandovali* and *T. rosablanca* may be close relatives, which would imply a single cave colonization event by *Trichomycterus* in Santander. However, available information is insufficient to reach such a conclusion owing to limited geographic and taxonomic sampling. Here, new sequence data, generated from specimens collected in multiple localities of Colombia, allow for a first robust test of hypotheses posed to trace the history of colonization events in the group.

## MATERIAL AND METHODS

### STUDY SYSTEM

*Trichomycterus* is one of the most taxonomically challenging groups of Neotropical fish. The genus comprises c. 170 species (half the richness of its family Trichomycteridae; Fricke *et al.*, 2020), and it ranges from Costa Rica to northern Patagonia. Species of *Trichomycterus* inhabit lowland to mountain freshwater streams, with an important fraction of its taxonomic diversity concentrated in the Colombian Andes (DoNascimento & Prada Pedreros, 2020). To date, 12 species living in cave environments have been described from disjunct regions, including Bolivia (one species), Brazil (three), Venezuela (one) and the eastern Cordillera of Colombia (seven; Fig. 1; Bichuette & Rizzato, 2012; Ardila-Rodríguez, 2018; Castellanos-Morales, 2018; Mesa S. *et al.*, 2018). *Trichomycterus* is considered a non-diagnosable, non-monophyletic genus, where species failing to meet diagnoses for other genera are often placed (Ochoa *et al.*, 2017; Katz *et al.*, 2018; Ochoa *et al.*, 2020). One of the main issues complicating the taxonomy of the species of *Trichomycterus* is their simplified morphology, which features relatively few diagnostic characters. However, a recent analysis using data from multiple genes partly clarified phylogenetic relationships in the genus, sorted species into clades largely matching large-scale geographical distributions and made hundreds of sequences available to be employed in additional analyses (Ochoa *et al.*, 2017). We here capitalize on these existing data, complemented with newly generated sequences from specimens we collected, to test hypotheses about evolution in cave environments in Colombia. As a first approximation to

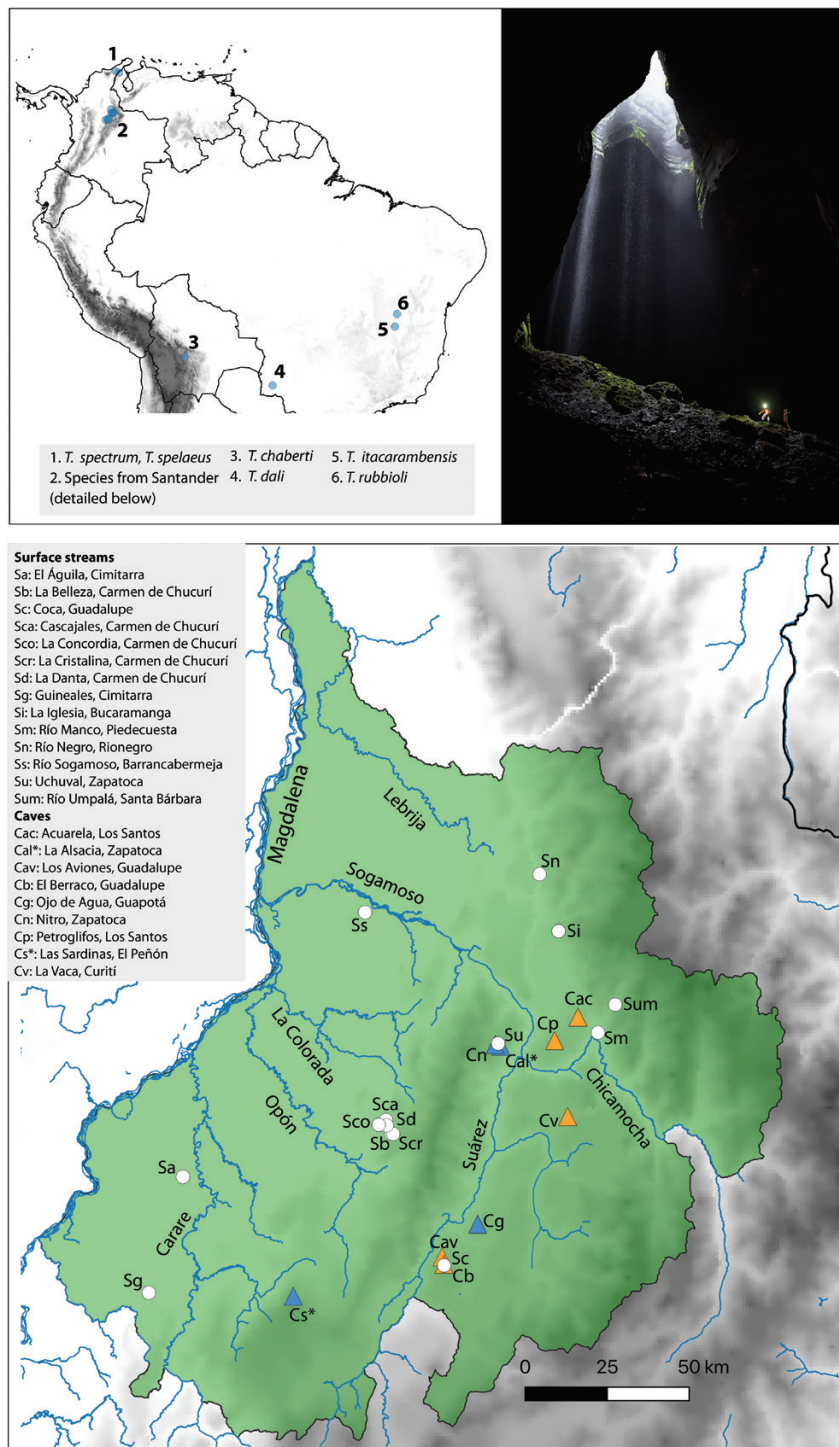

**Figure 1.** Type localities of cave species of *Trichomycterus* in the Neotropical region (top left), a photograph showing an example of habitats occupied by fishes in this system (Las Sardinias Cave, the type locality of *T. rosablanca*; photo by Felipe Villegas) and map of the Department of Santander showing the collection sites of specimens of *Trichomycterus* analysed in this study (bottom). Triangles correspond to caves, circles to surface streams. Orange triangles correspond to cave localities where fishes show reduced eyes and coloration, and blue triangles to caves where fishes have regular eyes and coloration. Cave localities are designated with letter C and surface streams with the letter S. The type localities of cave species *T. rosablanca* (Cs) and *T. sandovali* (Cal) are indicated with asterisks. Photograph (El Peñón, Santander) by Felipe Villegas-Instituto Humboldt.

**Table 1.** Cave and surface populations of *Trichomycterus* sampled for this study

| Terminal taxon                      | Habitat | Cave phenotype | Catalog number | Locality                                          | Geographic coordinates | GenBank/<br>BOLD accession codes |
|-------------------------------------|---------|----------------|----------------|---------------------------------------------------|------------------------|----------------------------------|
| <i>Bullockia maldonadoi</i>         | Surface | no             | LBP3112        | La Laja, Biobio, Chile                            | -37.2152, -72.4469     | KY857926.1                       |
| <i>Cambeva davisii</i>              | Surface | no             | LBP7130        | Parapananema, Brazil                              |                        | KY857988.1                       |
| <i>Cambeva diatropoporos</i>        | Surface | no             | LBP14694       | Jacuí, Laguna dos Patos, Brazil                   |                        | KY857996.1                       |
| <i>Cambeva zonata</i>               | Surface | no             | LBP2653        | Ribeira de Iguape, Atlantic, Brazil               | -24.6866, -48.9945     | KY857986.1                       |
| <i>Copionodon pecten</i>            | Surface | no             | LBP2653        | Paraguaçu, Atlantic, Brazil                       |                        | KY857986.1                       |
| <i>Eremophilus mutissii</i>         | Surface | no             | ANSP11306      | Magdalena drainage, Colombia                      |                        | KY857931.1                       |
| <i>Ituglanis goya</i>               | Surface | no             | LBP17131       | das Almas, Tocantins, Brazil                      | -13.7551, -47.4555     | KY857945.1                       |
| <i>Ituglanis ramiroi</i>            | Surface | no             | LBPV-63262     | Paraná, Tocantins, Brazil                         |                        | KY857998.1                       |
| <i>Ituglanis eichorniarum</i>       | Surface | no             | LBP4686        | Paraguay, Paraná, Brazil                          | -14.6955, -57.2597     | KY857939.1                       |
| <i>Nematogenys inermis</i>          | Surface | no             | LBP3105        | Concepción, Chile                                 |                        | KY857952.1                       |
| <i>Scleronema minutum</i>           | Surface | no             | LBP13185       | Laguna dos Patos, Atlantic, Brazil                |                        | KY857962.1                       |
| <i>Scleronema minutum</i>           | Surface | no             | LBP3310        | Laguna dos Patos, Atlantic, Brazil                |                        | KY857957.1                       |
| <i>Trichomycterus banneau</i>       | Surface | no             | LBP19537       | Magdalena drainage, Colombia                      |                        | KY858001.1                       |
| <i>Trichomycterus cachiraensis</i>  | Surface | no             | LBP19832       | Galvanes, Magdalena drainage, Colombia            | 7.70626, -73.0359      | KY857971.1                       |
| <i>Trichomycterus guianensis</i>    | Surface | no             | LBP17444       | Potaro, Essequibo, Guyana                         | 5.33777, -59.5658      | KY857974.1                       |
| <i>Trichomycterus itatayae</i>      | Surface | no             | LBP16356       | Paraíba do Sul, Atlantic, Brazil                  |                        | KY857977.1                       |
| <i>Trichomycterus knerii</i>        | Surface | no             | LBP18717       | Meta, Orinoco drainage, Colombia                  | 3.88101, -73.7822      | KY857987.1                       |
| <i>Trichomycterus punctulatus</i>   | Surface | no             | ANSP180733     | Pisco, Pacific, Perú                              | -13.6666, -75.7716     | KY857983.1                       |
| <i>Trichomycterus piratymbara</i>   | Surface | no             | LBP9004        | Grande, Paraná, Brazil                            | -20.6237, -46.2304     | KY857970.1                       |
| <i>Trichomycterus reinhardti</i>    | Surface | no             | LBP16302       | Paraopeba, São Francisco, Brazil                  | -20.1945, -44.1014     | KY857997.1                       |
| <i>Trichomycterus rosablanca</i>    | Cave    | yes            | 0502-I         | Sardinas cave, Carare River drainage, El Peñón    | 6.09333, -73.8285      | MH407228.1                       |
| <i>Trichomycterus ruitoquensis</i>  | Surface | no             | LBP19838       | Rio Frio, Magdalena drainage, Colombia            | 7.06902, -73.0704      | KY857984.1                       |
| <i>Trichomycterus sandovali</i>     | Cave    | yes            | LBP19833       | Magdalena drainage, Colombia                      | 6.80375, -73.2730      | KY857985.1                       |
| <i>Trichomycterus spilosoma</i>     | Surface | no             | LBP19339       | Pacific, Ecuador                                  |                        | KY857942.1                       |
| <i>Trichomycterus stramineus</i>    | Surface | no             | LBP19834       | Manco River, Sogamoso River drainage, Piedecuesta | 6.84947, -72.9886      | KY858006.1                       |
| <i>Trichomycterus striatus</i>      | Surface | no             | LBP19846       | Magdalena, drainage, Colombia                     |                        | KY858003.1                       |
| <i>Trichomycterus transandianus</i> | Surface | no             | LBP19844       | Magdalena, drainage, Colombia                     |                        | KY858004.1                       |
| <i>Trichogenes longipinnis</i>      | Surface | no             | LBP3862        | Camburi, Atlantic, Brazil                         | -23.3518, -44.7635     | KY857961.1                       |



Table 1. Continued

| Terminal taxon                                               | Habitat | Cave phenotype | Catalog number | Locality                                                           | Geographic coordinates | GenBank/BOLD accession codes |
|--------------------------------------------------------------|---------|----------------|----------------|--------------------------------------------------------------------|------------------------|------------------------------|
| <i>Trichomycterus</i> aff. <i>transandianus</i> IAvH-P 17683 | Surface | no             | IAvH-P 17683   | Colorada River drainage, vereda La Belleza, Carmen de Chucurí      | 6.55800, -73.55900     | SBIOF015-19                  |
| <i>Trichomycterus areolatus</i>                              | Surface | no             | LBP3118        | Tolten, Pacific, Chile                                             |                        | KY857964.1                   |
| <i>Trichomycterus calai</i> IAvH-P 17803                     | Surface | no             | IAvH-P 17803   | Carare River drainage, Cimitarra                                   | 6.58200, -73.59330     | SBIOF014-19                  |
| <i>Trichomycterus</i> cf. <i>mogotensis</i> IAvH-P 21069     | Surface | no             | IAvH-P 21069   | Umpalá River, Chicamocha River drainage, Santa Bárbara             | 6.91303, -72.94260     | SBIOF071-19                  |
| <i>Trichomycterus</i> sp. Curití ID 422                      | Cave    | no             | IAvH-P-23284   | Vaca cave, Fonce River drainage, Curití                            | 6.60458, -73.07350     | MT682739                     |
| <i>Trichomycterus</i> sp. Curití ID 425                      | Cave    | no             | IAvH-P-23285   | Vaca cave, Fonce River drainage, Curití                            | 6.60458, -73.07350     | MT682738                     |
| <i>Trichomycterus</i> sp. Curití ID 426                      | Cave    | no             | IAvH-P-23286   | Vaca cave, Fonce River drainage, Curití                            | 6.60458, -73.07350     | MT682740                     |
| <i>Trichomycterus latistriatus</i> ("guacamayoensis")        | Cave    | no             | CBHHS010-17    | Los Aviones cave, Suárez River drainage, Guadalupe                 | 6.21789, -73.41890     | ADI1985                      |
| <i>Trichomycterus ruitoquensis</i> IAvH-P 12397              | Surface | no             | IAvH-P 12397   | Río Negro, Rionegro                                                | 6.11954, -74.22620     | SBIOF102-19                  |
| <i>Trichomycterus ruitoquensis</i> ID 02 La Iglesia          | Surface | no             | IAvH-P-23251   | Iglesia stream, Lebrija River drainage, Pan de Azúcar, Bucaramanga | 7.11537, -73.09845     | MT682734                     |
| <i>Trichomycterus ruitoquensis</i> ID 03 La Iglesia          | Surface | no             | IAvH-P-23252   | Iglesia stream, Lebrija River drainage, Pan de Azúcar, Bucaramanga | 7.11537, -73.09845     | MT682735                     |
| <i>Trichomycterus ruitoquensis</i> ID 04 La Iglesia          | Surface | no             | IAvH-P-23253   | Iglesia stream, Lebrija River drainage, Pan de Azúcar, Bucaramanga | 7.11537, -73.09845     | MT682736                     |
| <i>Trichomycterus ruitoquensis</i> ID 05 La Iglesia          | Surface | no             | IAvH-P-23254   | Iglesia stream, Lebrija River drainage, Pan de Azúcar, Bucaramanga | 7.11537, -73.09845     | MT682737                     |
| <i>Trichomycterus sandovali</i> ID 402                       | Cave    | yes            | IAvH-P-23261   | Alsacia cave, Suárez River drainage, Zapatoaca                     | 6.79839, -73.25728     | MT682749                     |
| <i>Trichomycterus sandovali</i> ID 403                       | Cave    | yes            | IAvH-P-23262   | Alsacia cave, Suárez River drainage, Zapatoaca                     | 6.79839, -73.25728     | MT682757                     |
| <i>Trichomycterus sandovali</i> ID 404                       | Cave    | yes            | IAvH-P-23263   | Alsacia cave, Suárez River drainage, Zapatoaca                     | 6.79839, -73.25728     | MT682758                     |
| <i>Trichomycterus</i> sp. Carare IAvH-P 20905                | Surface | no             | IAvH-P 20905   | Carare River drainage, Cimitarra                                   | 6.43868, -74.13230     | SBIOF097-19                  |

Table 1. Continued

| Terminal taxon                                     | Habitat | Cave phenotype | Catalog number | Locality                                                         | Geographic coordinates | GenBank/BOLD accession codes |
|----------------------------------------------------|---------|----------------|----------------|------------------------------------------------------------------|------------------------|------------------------------|
| <i>Trichomycterus</i> sp. Carare IAvH-P 20978      | Surface | no             | IAvH-P 20978   | Carare River drainage, Cimitarra                                 | 6.11954, -74.22620     | SBIOF099-19                  |
| <i>Trichomycterus</i> sp. Guadalupe ID 410         | Surface | no             | IAvH-P-23269   | Coca stream, Suárez River drainage, Guadalupe                    | 6.19471, -73.41343     | MT682761                     |
| <i>Trichomycterus</i> sp. Guadalupe ID 411         | Surface | no             | IAvH-P-23270   | Coca stream, Suárez River drainage, Guadalupe                    | 6.19471, -73.41343     | MT682762                     |
| <i>Trichomycterus</i> sp. Guadalupe ID 413         | Surface | no             | IAvH-P-23273   | Coca stream, Suárez River drainage, Guadalupe                    | 6.19471, -73.41343     | MT682765                     |
| <i>Trichomycterus</i> sp. Guadalupe ID 414         | Cave    | no             | IAvH-P-23274   | Berraco cave, Suárez River drainage, Guadalupe                   | 6.19802, -73.41380     | MT682764                     |
| <i>Trichomycterus</i> sp. Guadalupe ID 416         | cave    | no             | IAvH-P-23276   | Berraco cave, Suárez River drainage, Guadalupe                   | 6.19802, -73.41380     | MT682763                     |
| <i>Trichomycterus</i> sp. Guapotá ID 417           | Cave    | yes            | IAvH-P-23278   | Ojo de Agua cave, Suárez River drainage, Guapotá                 | 6.30815, -73.32090     | MT682741                     |
| <i>Trichomycterus</i> sp. Guapotá ID 420           | Cave    | yes            | IAvH-P-23281   | Ojo de Agua cave, Suárez River drainage, Guapotá                 | 6.30815, -73.32090     | MT682743                     |
| <i>Trichomycterus</i> sp. Guapotá ID 421           | Cave    | yes            | IAvH-P-23282   | Ojo de Agua cave, Suárez River drainage, Guapotá                 | 6.30815, -73.32090     | MT682742                     |
| <i>Trichomycterus</i> sp. La Colorada IAvH-P 17686 | Surface | no             | IAvH-P 17686   | La Cristalina stream, Colorada River drainage, Carmen de Chucuri | 6.55697, -73.55370     | SBIOF020-19                  |
| <i>Trichomycterus</i> sp. La Colorada IAvH-P 17716 | Surface | no             | IAvH-P 17716   | Cascajales river, Colorada River drainage, Carmen de Chucuri     | 6.59519, -73.57340     | SBIOF024-19                  |
| <i>Trichomycterus</i> sp. La Colorada IAvH-P 17723 | Surface | no             | IAvH-P 17723   | La Danta stream, Colorada River drainage, Carmen de Chucuri      | 6.58036, -73.57130     | SBIOF027-19                  |
| <i>Trichomycterus</i> sp. La Colorada IAvH-P 17734 | Surface | no             | IAvH-P 17734   | La Concordia stream, Colorada River drainage, Carmen de Chucuri  | 6.58200, -73.59330     | SBIOF030-19                  |
| <i>Trichomycterus</i> sp. Sogamoso IAvH-P20797     | Surface | no             | IAvH-P20797    | Magdalena River basin, Barrancabermeja                           | 7.16718, -73.63080     | SBIOF081-19                  |
| <i>Trichomycterus</i> sp. Zapatoca ID 06           | Cave    | yes            | IAvH-P-23255   | Nitro cave, Suárez River drainage, Zapatoca                      | 6.80313, -73.27282     | MT682755                     |
| <i>Trichomycterus</i> sp. Zapatoca ID 07           | Cave    | yes            | IAvH-P-23256   | Nitro cave, Suárez River drainage, Zapatoca                      | 6.80313, -73.27282     | MT682750                     |
| <i>Trichomycterus</i> sp. Zapatoca ID 08           | Cave    | yes            | IAvH-P-23257   | Nitro cave, Suárez River drainage, Zapatoca                      | 6.80313, -73.27282     | MT682746                     |

Table 1. Continued

| Terminal taxon                             | Habitat | Cave phenotype | Catalog number | Locality                                                           | Geographic coordinates | GenBank/BOLD accession codes |
|--------------------------------------------|---------|----------------|----------------|--------------------------------------------------------------------|------------------------|------------------------------|
| <i>Trichomycterus</i> sp. Zapatoca ID 09   | Cave    | yes            | IaVH-P-23258   | Nitro cave, Suárez River drainage, Zapatoca                        | 6.80313, -73.27282     | MT682756                     |
| <i>Trichomycterus</i> sp. Zapatoca ID 10   | Cave    | yes            | IaVH-P-23259   | Nitro cave, Suárez River drainage, Zapatoca                        | 6.80313, -73.27282     | MT682744                     |
| <i>Trichomycterus</i> sp. Zapatoca ID 408  | Surface | no             | IaVH-P-23267   | Uchual stream, Sogamoso River drainage, Zapatoca                   | 6.80594, -73.26463     | MT682759                     |
| <i>Trichomycterus</i> sp. Zapatoca ID 409  | Surface | no             | IaVH-P-23268   | Uchual stream, Sogamoso River drainage, Zapatoca                   | 6.80594, -73.26463     | MT682745                     |
| <i>Trichomycterus</i> sp. ID 01 La iglesia | Surface | no             | IaVH-P-23250   | Iglesia stream, Lebrija River drainage, Pan de Azúcar, Bucaramanga | 7.11537, -73.09845     | MT682733                     |
| <i>Trichomycterus uisae</i> ID 427         | Cave    | no             | IaVH-P-23288   | Petroglifos cave, Sogamoso River drainage, Los Santos              | 6.81385, -73.10935     | MT682754                     |
| <i>Trichomycterus uisae</i> ID 428         | Cave    | no             | IaVH-P-23289   | Petroglifos cave, Sogamoso River drainage, Los Santos              | 6.81385, -73.10935     | MT682753                     |
| <i>Trichomycterus uisae</i> ID 429         | Cave    | no             | IaVH-P-23290   | Petroglifos cave, Sogamoso River drainage, Los Santos              | 6.81385, -73.10935     | MT682760                     |
| <i>Trichomycterus uisae</i> ID 430         | Cave    | no             | IaVH-P-23291   | Petroglifos cave, Sogamoso River drainage, Los Santos              | 6.81385, -73.10935     | MT682752                     |
| <i>Trichomycterus uisae</i> ID 431         | Cave    | no             | IaVH-P-23293   | Acuarela cave, Sogamoso River drainage, Piedecuesta                | 6.87845, -73.04520     | MT682748                     |
| <i>Trichomycterus uisae</i> ID 433         | Cave    | no             | IaVH-P-23294   | Acuarela cave, Sogamoso River drainage, Piedecuesta                | 6.87845, -73.04520     | MT682747                     |
| <i>Trichomycterus uisae</i> ID 435         | Cave    | no             | IaVH-P-23295   | Acuarela cave, Sogamoso River drainage, Piedecuesta                | 6.87845, -73.04520     | MT682751                     |

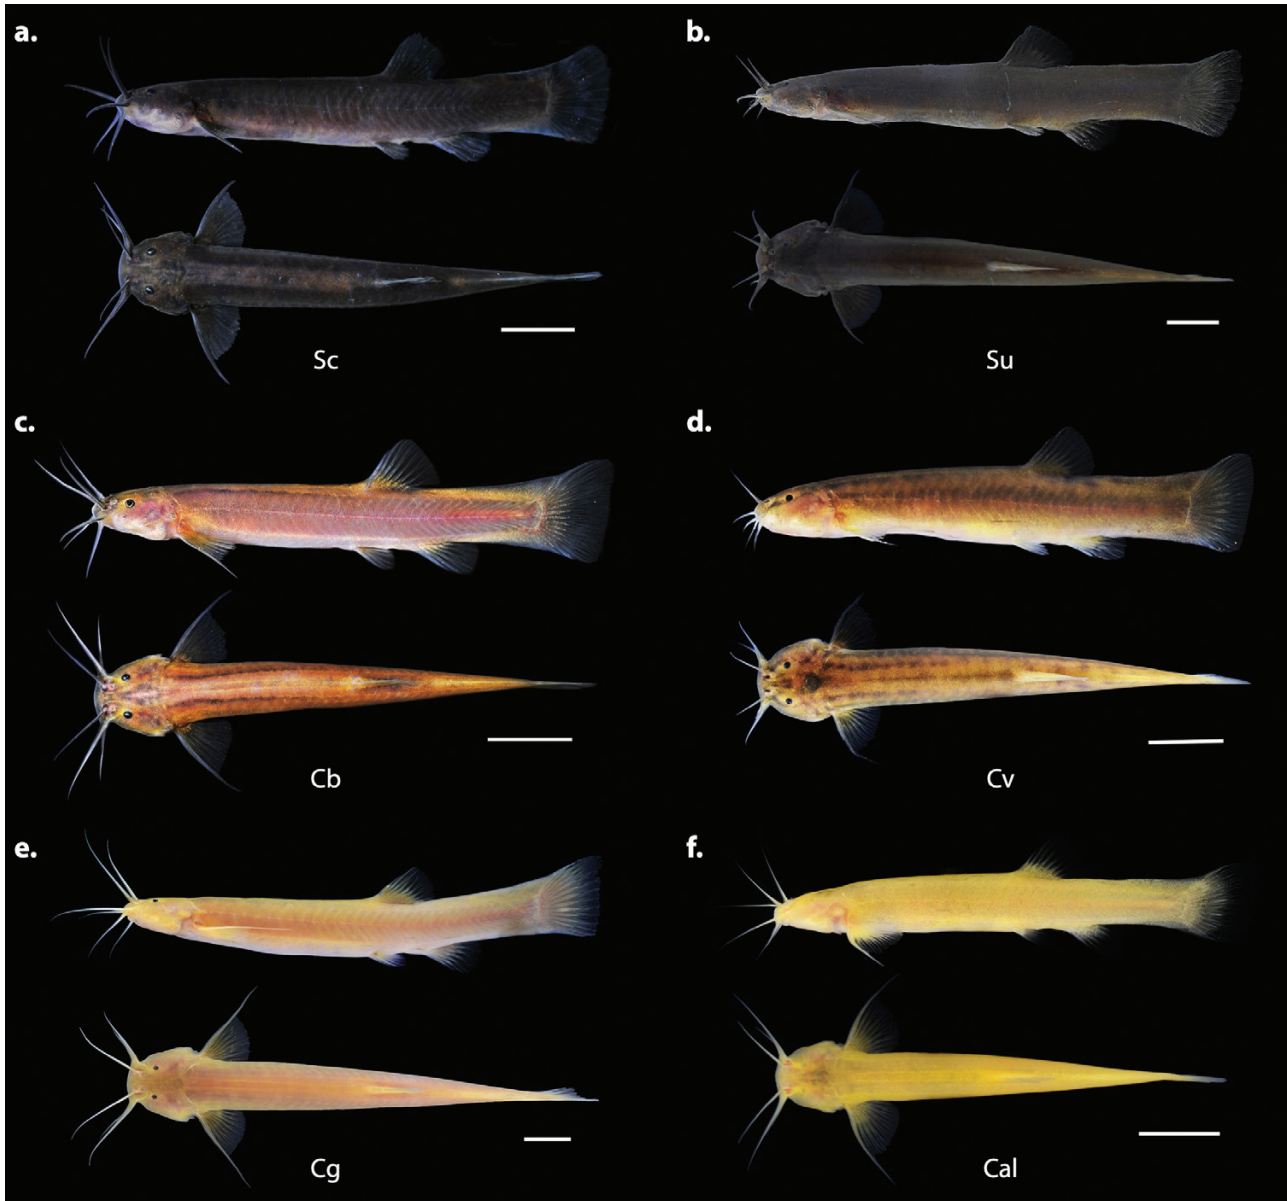

**Figure 2.** Morphological variability of some species of *Trichomycterus* included in this study. Lateral and dorsal view of the same individual from cave localities (designated with letter C) and surface streams (designated with letter S). Sc = Coca, Guadalupe; Su = Uchuval, Zapatoca; Cb = El Berraco, Guadalupe; Cv = La Vaca, Curití; Cg = Ojo de Agua, Guapotá; Cal = La Alsacia, Zapatoca. Bar indicates 1 cm.

this complex system, we focused our sampling efforts in the Department of Santander, the area with the most extensive karstic landscape of the country (Mendoza, Murillo, & Orjuela, 2009; Muñoz-Saba *et al.*, 2013).

The eastern Cordillera of Colombia is a mountain chain c. 500 km long, 150–200 km wide and reaching elevations of c. 1.3–5.0 km on average (Horton, Parra & Mora, 2020). Its exposed area of 100 000 km<sup>2</sup> is composed mostly of sedimentary rocks from the Upper and Lower Cretaceous (50% and 30%, respectively;

Horton *et al.*, 2020). During the Cretaceous, the area was a shallow ocean where sediments formed sandstones, mudstones and carbonates (Hoorn *et al.*, 2010; Blandin & Purser, 2013; Horton *et al.*, 2020). These carbonate-limestone formations resulted in a karstic landscape due to meteoric and erosional processes caused by rock fracturing during the uplift of the eastern Cordillera since the Miocene (~13.5–11.8 Mya; Albert & Reis, 2011) and by the high precipitation in this tropical region (Kay & Madden, 1997).



Cave and surface trichomycterids have been found across karstic landscapes of the eastern Cordillera of Colombia in several departments, especially Santander (Castellanos-Morales & Galvis, 2012; DoNascimento *et al.*, 2017). The limestone formations in Santander include the Cumbre, Rosablanca, Paja and Tablazo geological formations (Gaona-Narváez, 2015; Gómez-Tapia *et al.*, 2015), which have hundreds of caves spread in a relatively small area (~170 km) that remains largely scientifically unexplored (Mendoza *et al.*, 2009; Muñoz-Saba *et al.*, 2013). Geological and ecological information is only available for the El Peñón cave system (the type locality of *Trichomycterus rosablanca*; Lasso *et al.*, 2019), where caves form a complex with more than 100 km of passages. Caves in this system comprise a wide array of aquatic microhabitats, from small occasional pools to streams, tall waterfalls (some > 155 m) and large pools reaching > 145 m in diameter (Lasso *et al.*, 2019). The El Peñón system is perhaps the largest in Santander, but other caves have hundreds of meters of passages with water bodies composed of stream-pool systems (e.g. Cueva Ojo de Agua in Guapotá; pers. obs.).

#### SAMPLING

We sampled populations of *Trichomycterus* catfish in caves and surface streams, seeking to collect specimens from caves and adjacent streams whenever possible (Table 1). We collected 49 specimens from several populations in 2017, using hand nets or electrofishing (Samus-725 M), following methods for cavefish sampling proposed by Muñoz-Saba *et al.* (2013). Fish were photographed, euthanized by immersion in roxicaine and preserved in 96% ethanol. Taxonomic identification of specimens was based on comparison with original descriptions and geographic correspondence with the type locality of nominal species, followed by comparative morphological examination of specimens available at the Freshwater Fish Collection of the Instituto Alexander von Humboldt (IAvH-P). We followed the nomenclature of DoNascimento & Prada-Pedrerros (2020) regarding synonymization of some recently described taxa from Santander. All samples were deposited at IAvH-P. We also analysed specimens collected in different drainages in Santander in 2018 during the ‘Santander Bio’ expeditionary project (Torres & Quiñones, 2019), several of which likely correspond to undescribed species of *Trichomycterus* (Table 1). Our sampling also included *Copionodon pecten* de Pinna, 1992 (Copionodontinae), *Nematogenys inermis* Guichenot, 1848 (Nematogenyidae) and *Trichogenes longipinnis* Britski & Ortega, 1983 (Trichogeninae), which we included as outgroups for phylogenetic analyses based on previous studies (Ochoa *et al.*, 2017, 2020).

#### DNA EXTRACTION AND SEQUENCING

We used sequences of the mitochondrial *COI* gene to reconstruct the phylogenetic relationships of *Trichomycterus* from Santander. This rapidly evolving marker was one of the genes used by Ochoa *et al.* (2017) to reconstruct the phylogeny of Trichomycteridae, and genealogies constructed using *COI* data are consistent with multilocus phylogenies of the group (Ochoa *et al.*, 2017; Ochoa *et al.*, 2020). We extracted total genomic DNA from the right pelvic fin using a phenol-chloroform-isoamyl alcohol protocol (Wasko *et al.*, 2003). We amplified a 652-bp segment of the *COI* mitochondrial gene, using primers FishF1 and FishR1 (Ward *et al.*, 2005). We conducted PCRs in a volume of 25 µL, containing 2.5 µL of Buffer 10X, 1.5 µL of MgCl<sub>2</sub> (50 mmol/L), 0.5 µL of dNTPs (10 mmol/L), 0.2 µL of Taq Polymerase (5U/µL), 1.25 µL of each primer, 1 µL of BSA (0.066 mmol/L), 4 µL of template DNA and 12.8 µL of ddH<sub>2</sub>O. The cycling included an initial denaturation at 94 °C for 120 s; 34 cycles of denaturation at 94 °C for 240 s, annealing at 54 °C for 30 s, hybridization at 72 °C for 45 s and extension at 72 °C for 600 s. Polymerase chain reaction (PCR) products were sequenced at MacroGen Inc. and the sequencing facilities of the Universidad de Los Andes (Bogotá, Colombia), resulting in 41 *COI* gene sequences, which we visualized, edited and aligned using the MUSCLE algorithm (Edgar, 2004) in GENEIOUS v.10.1.3 (Kearse *et al.*, 2012). Combining our new data with existing sequences resulted in an alignment comprising a total of 74 sequences (Table 1).

#### PHYLOGENETIC ANALYSES

We used Bayesian inference as implemented in MrBayes v.3.2.6 (Huelsenbeck & Ronquist, 2001) and maximum likelihood in RAxML v.8.2.10 (Stamatakis, 2014) to infer gene trees based on *COI* sequences. Bayesian analyses were conducted under the GTR+I+G model of nucleotide substitution, identified as the best-fit to the *COI* data as per the Akaike information criterion in PartitionFinder v.2.1.1 (Lanfear *et al.*, 2012). We ran 30 million generations, with two runs of four independent Markov chain Monte Carlo (MCMC) chains (three heated, one cold), sampling trees every 1000 generations. We evaluated convergence of MCMC analysis by checking values of the standard deviation of split frequencies, potential scale reduction factor and effective sample size using software TRACER 1.7 (Rambaut *et al.*, 2018). We discarded 25% of generations as burn-in and the remaining parameters in BI analysis were set by default. The maximum-likelihood analysis was performed under the GTR+GAMMA model and bootstrap resampling was applied to assess nodal support using the autoMRE criterion. To

further examine relationships among *COI* haplotypes, we constructed a median-joining haplotype network using PopArt v.1.7 (Leigh & Bryant, 2015) and redrew it manually. Finally, we asked whether a phylogeny enforcing the monophyly of cave species was less likely than unconstrained topologies using a Shimodaira–Hasegawa test (Shimodaira, 2002), implemented in the *phangorn* package (Schliep, 2011) for R (R Development Core Team, 2018).

## RESULTS

We analysed 522 base pairs of the *COI* gene, of which 162 were variable (22 singletons, 140 parsimony-informative sites). Bayesian and maximum-likelihood analyses resulted in nearly identical topologies (see Supporting Information, Fig. S1–S2), showing that cave forms of *Trichomycterus* in Santander have evolved independently at least twice. One evolutionary event corresponds to *Trichomycterus rosablanca*, which was recovered with strong support (0.96 posterior probability, 72% maximum likelihood bootstrap) as sister to *Eremophilus mutisii* Humboldt, 1805, a species that lives in surface streams in the Bogotá River basin, has conspicuous eyes and shows profusely vermiculated dark coloration (Fig. 3, clade 1). The second evolutionary event corresponded to a clade including the species *T. sandovali* and specimens from the Sogamoso River drainage, including surface populations and all the remaining cave species and populations analysed (Fig. 3, clade 2). Relationships among the clades including *T. rosablanca* and *E. mutisii*, *T. sandovali* and allies, and other species are not strongly supported, but the Shimodaira–Hasegawa test shows that unconstrained and constrained topologies differ significantly. The topology in which cave populations are monophyletic was less fit to the data than the unconstrained topology in which troglomorphic traits are homoplasious ( $P = 0.002$ ). We thus reject the hypothesis of a single origin for the evolution of cave-living and associated phenotypes (i.e. loss of eyes and pigmentation).

We found that cave populations referred to *Trichomycterus sandovali* were more closely allied to surface taxa than to the cave species *T. rosablanca*. Moreover, the genetic divergence between cave-dwelling *T. sandovali* and other taxa from both surface streams and caves was shallow to non-existent. For example, we observed no genetic divergence between cave and surface populations from Zapatoca: the surface population showed eyes and a spotted to homogeneously dark coloration, whereas cave populations (one of them collected at the type locality of *T. sandovali*) had reduced eyes or lacked them and their coloration is faint. There was no genetic

divergence between populations from Zapatoca and Los Santos (the latter collected close to the type locality of *T. uisae* Castellanos-Morales, 2008), which are separated by the deep Sogamoso River basin (Fig. 3, clade 2). Likewise, cave and surface populations collected in Guadalupe and Guapotá (Suárez River drainage) and Curití (Fonce River drainage) differed only by two substitutions from those collected at the type locality of *T. sandovali*. The haplotype network for clade 2 showed that cave and surface populations share haplotypes, suggesting recent divergence or gene flow (Fig. 3, median-joining network). Furthermore, we found no genetic differences in *COI* sequences between *T. sandovali* and two other cave species, namely '*T. guacamayoensis*' Ardila Rodríguez, 2018 [recently shown to be a junior synonym of *T. latistriatus* (Eigenmann, 1917); see DoNascimento & Prada-Pedrerós, 2020] and *T. uisae* (Fig. 3).

Despite their geographic proximity to surface and cave populations from Santander, several surface taxa from our study area were more closely related to species from other regions (Fig. 3). The species *Trichomycterus ruitoquensis* Ardila Rodríguez, 2007, *T. stramineus* (Eigenmann, 1917) and undescribed taxa recently collected in the Carare, Colorada and Sogamoso rivers, belonged to clades with species not occurring in Santander, like *T. striatus* (Meek & Hildebrand, 1913) (restricted to Costa Rica and Panamá) and *T. banneau* (Eigenmann, 1912) (from tributaries in the upper Magdalena basin, Department of Tolima, Colombia).

We find two additional unexpected results. First, our data revealed a potentially undescribed species in the La Iglesia surface stream in the city of Bucaramanga, Santander. Most of the specimens we collected at this locality corresponded genetically and morphologically to *Trichomycterus ruitoquensis* (Fig. 3, clade 1). However, one of the individuals collected in the same stream differed genetically from *T. ruitoquensis* by five substitutions in *COI* and morphologically by an irregular spotted pattern (vs. regular in *T. ruitoquensis*). Second, we observed atypical coloration among some surface individuals collected in the Uchual stream, near the Nitro and Alsacia caves in Zapatoca. Some individuals showed a homogeneously dark pigmentation, which differed from other individuals from the same stream exhibiting a spotted pigmentation pattern on the body (Fig. 2).

## DISCUSSION

Our study provides evidence for the repeated evolution of cave-living forms from surface ancestors in trichomycterid catfish in a restricted geographic region in Colombia. At least two lineages (*Trichomycterus*

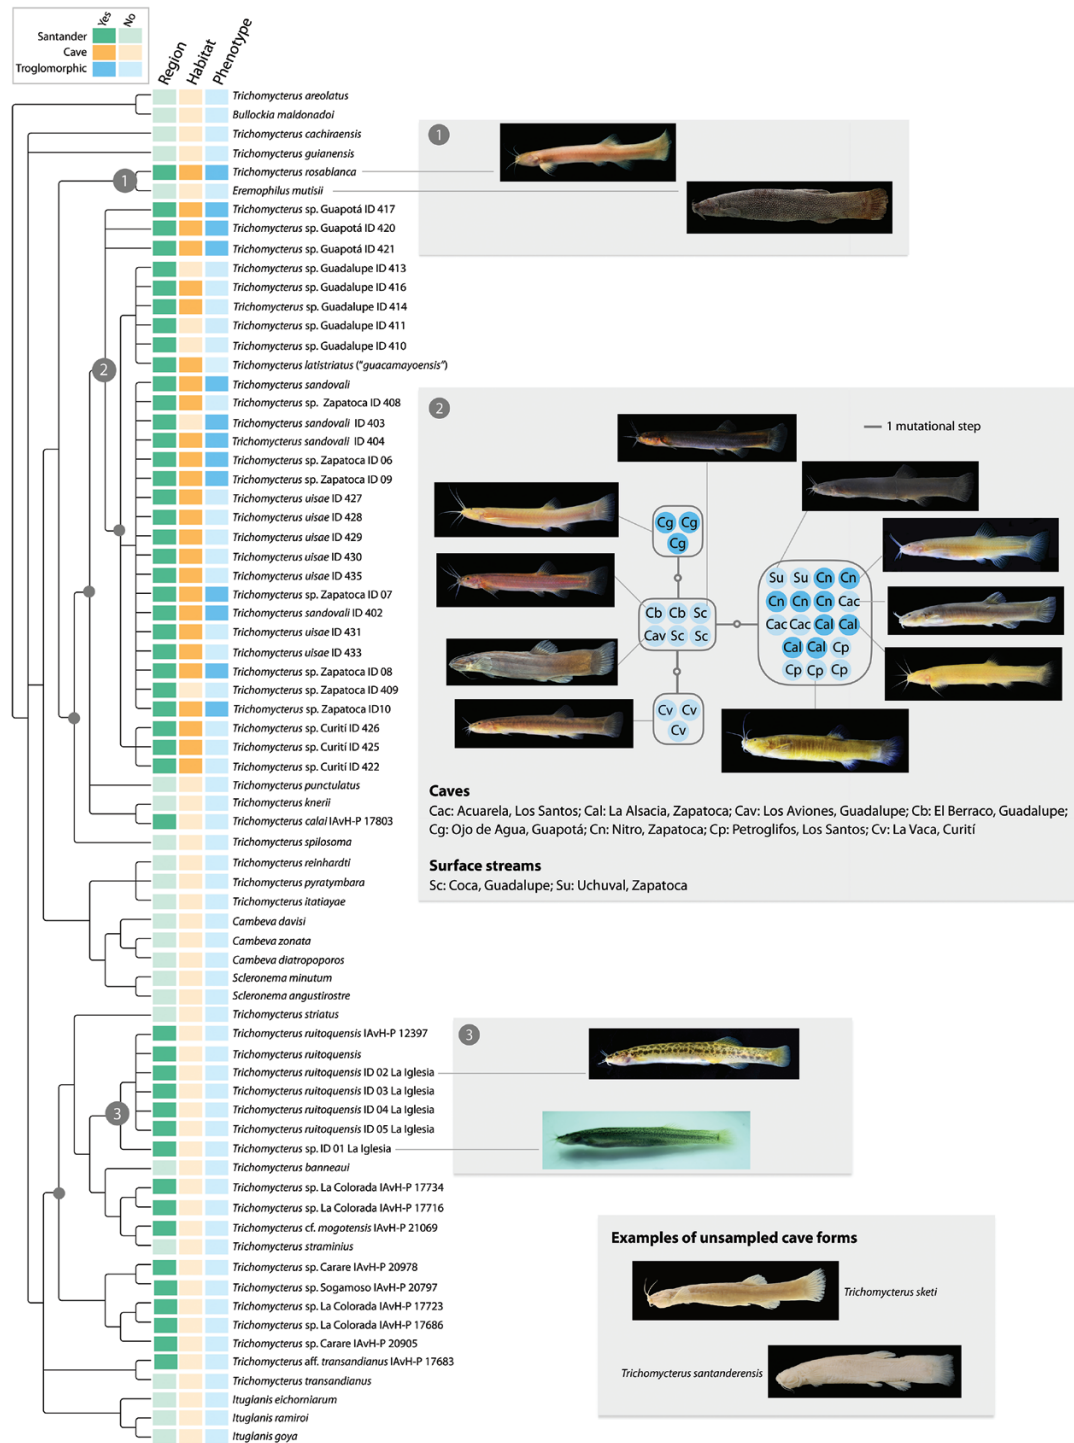

Downloaded from https://academic.oup.com/zool/advance-article/doi/10.1093/zool/1154 by guest on 23 April 2024

**Figure 3.** Relationships among catfish in *Trichomycterus* and other genera reveal repeated colonization of caves and phenotypic convergence in the karst region of Santander, Colombia. The Bayesian gene tree on the left is an overview of phylogeny based on sequences of the *COI* gene (outgroups not shown). Colours at the tips indicate whether specimens were collected in the western slope of the Eastern Andes of Santander, whether they were found in cave habitats, and whether they lacked eyes or body pigmentation (i.e. troglomorphy). Strongly supported nodes (posterior probability  $\geq 0.95$ , maximum likelihood bootstrap  $\geq 70\%$ ) relevant to the phylogenetic position of specimens from Santander are indicated with circles; numbered nodes are mentioned in the text and panels on the right. Node 1 defines a clade formed



*rosablanca* and *T. sandovali* and allies) colonized caves independently, and convergently evolved loss of eyes and body pigmentation in the karst region of Santander. These two lineages occur in separate drainages (Suárez and Carare rivers, respectively) that are not connected by river courses, further supporting the hypothesis that cave-living forms are derived from independent colonization events of subterranean environments in different areas. We lack DNA sequences from cave species of *Trichomycterus* from other countries in South America (Fig. 1A), but the vast geographical distances separating them, and overall congruence between geography and phylogeny in the group (Ochoa *et al.*, 2017; Katz *et al.*, 2018; Ochoa *et al.*, 2020), suggest that species of *Trichomycterus* have independently colonized caves multiple times. Also, it remains possible that cave species from Santander, which we did not sample, may have independently colonized these environments (Fig. 3). Examples include *T. santanderensis* Castellanos-Morales, 2007 from the Lebrija River drainage, which we hypothesize belongs to the clade formed by *T. sandovali* and allies, and *T. sketi* Castellanos-Morales, 2011, which occurs in a separate drainage (Opón River) and may represent a distinct lineage.

Convergent evolution associated with cave living has been documented in other fish systems, including *Astyanax mexicanus* (Dowling *et al.*, 2002; Bradic *et al.*, 2012), *Garra barreimiae* Fowler & Steinitz 1956 (Kirchner *et al.*, 2017) and amblyopsids (Hart *et al.*, 2020). In all cases, cave-dwelling fish exhibit similar phenotypic traits, including absence or reduction of eyes and body pigmentation, suggesting adaptation to cave environments along similar trajectories. More broadly, such a pattern speaks to the repeatability of evolution by natural selection owing to common selective pressures and potentially to shared genetic and developmental constraints (Losos, 2017).

In addition to our finding of independent colonization of caves by *Trichomycterus rosablanca* and *T. sandovali*,

our work raises the intriguing possibility that different populations closely allied to the latter (i.e. members of clade 2) may have independently colonized and adapted to caves, in drainages along the Sogamoso drainage. Genetic similarity and haplotype sharing between surface and cave populations in this clade suggest that these populations diverged recently, that they still experience gene flow or both. Gene flow in these karstic systems is likely because the water flows in and, in some cases, out of caves, potentially allowing dispersal of adult fish, larvae or eggs. This result is consistent with studies in other cave organisms (*Astyanax mexicanus*, *Garra barreimiae* and cave salamanders) in which cave and surface populations are also connected by gene flow (Niemi *et al.*, 2008; Bradic *et al.*, 2012; Kirchner *et al.*, 2017), possibly due to sporadic flooding. Given genetic exchange between surface and cave environments, selective pressures strong enough to counteract the effects of migration are needed to account for phenotypic evolution in cavefish (Cartwright *et al.*, 2017). Accordingly, some studies suggest that divergence in the face of gene flow is a major driver of the evolution of cave-dwellers (Juan *et al.*, 2010; Bradic *et al.*, 2012). Limited genetic divergence between surface and cave populations is also consistent with scenarios in which the origin of cave phenotypes is initially promoted by phenotypic plasticity (Rohner *et al.*, 2013; Bilandžija *et al.*, 2019) or via epigenetic mechanisms (Gore *et al.*, 2018).

The mechanisms that drove the drastic morphological changes borne by *Trichomycterus* that colonized caves are unknown. Several studies on cave fish support the hypothesis of directed selection against eyes or indirect selection due to pleiotropy (Krishnan & Rohner, 2017). However, these phenotypic changes can also be explained by neutral evolution, with regressive mutations arising and accumulating without the ‘razor of selection’ (Wilkins, 2020). Future work extending our analyses to genome-wide assays of genetic variation will allow us to better characterize

---

by phenotypically contrasting species from caves in Santander (*T. rosablanca*) and surface streams in the Bogotá River basin (*Eremophilus mutisii*). Node 2 defines a large clade for which genealogical relationships are shown on the right with a median-joining network. Rectangles correspond to haplotypes and circles to individuals, with colours indicating whether or not specimens lacked eyes or pigmentation following the colour scheme in the phylogeny; upper-case letters indicate habitat (C = cave, S = surface) and lower-case letters define localities. Note that all specimens differ at most by two substitutions in *COI*, that individuals sharing two of the haplotypes occur in multiple localities including both caves and surface streams and that haplotypes are not consistently associated with phenotypes. The most common haplotype occurred both in caves and surface streams, and was shared by individuals with various phenotypes and by populations assigned to at least three different species: *T. sandovali*, *T. uisae* and ‘*T. guacamayoensis*’ (i.e. *T. latistriatus*). Finally, node 3 defines a clade from Santander more closely allied to species from other regions in the Neotropics than to taxa from the karst region; photographs of live fishes illustrate differences in phenotype between specimens from the same surface stream, which also differed genetically, highlighting a potentially undescribed species. The panel on the bottom illustrates two species from cave habitats in Santander lacking eyes and pigmentation, which we were unable to sample and may represent other instances of convergence. Photographs by the authors and by Felipe Villegas (*T. rosablanca*), Cesar Castellanos (*T. santanderensis* and *T. sketi*) and from DoNascimento *et al.* (2014; *E. mutisii*).



gene flow, elucidate relationships and estimate the timing of divergence among populations, assess the genetic basis of phenotypes and the importance of the action of selection in this system.

In addition to suggesting that caves were likely colonized repeatedly and that phenotypic evolution in *Trichomycterus* may occur rapidly and with gene flow, our finding of no genetic differentiation in the *COI* gene between cave-dweller and surface populations in the *T. sandovali* group (Fig. 3, clade 2) may have taxonomic implications. In particular, we found no genetic divergence among populations currently assigned to *T. sandovali*, '*T. guacamayoensis*' (i.e. *T. latistriatus*) and *T. uisae*, as well as specimens from the municipalities of Guadalupe, Guapotá and Zapatoca. Although the populations we sampled are separated by up to nearly a couple hundred kilometers and by deep canyons, and although some of them lack eyes and pigments while others have these traits, they all are genetically too similar to distinguish them using the mitochondrial marker we employed, which is often used as a barcode for species identification (Hebert *et al.*, 2003; Ward *et al.*, 2025, 2009). While lack of *COI* divergence may simply reflect recent diversification or gene flow, an alternative interpretation is that *T. sandovali* might not correspond to a cavefish species restricted to the Alsacia cave in Zapatoca as traditionally believed, but rather to a taxon with a much broader distribution consisting of hypogean and epigean populations throughout the Sogamoso River drainage, much like the case of the Mexican tetra (Bradic *et al.*, 2012). A taxonomic review is needed to assess whether some lineages included in our analysis correspond to undescribed species and others – currently considered valid species – should be synonymized.

The importance of more extensive sampling to better understand patterns of cave colonization and evolution in our study system is illustrated by comparing our results to those implied by previous phylogenetic studies of trichomycterids. It appeared likely that cave species from Santander had a single origin, based on work showing that two cave species lacking eyes and pigmentation (*T. sandovali* and *T. rosablanca*) occupied similar phylogenetic positions in analyses with partly overlapping and incomplete sampling (Mesa S. *et al.*, 2018; Ochoa *et al.*, 2017, 2020). By sampling multiple additional populations from the Santander karst region, we were able to determine (1) that *T. sandovali* and *T. rosablanca* belong to different clades, implying separate colonization of caves; and (2) that more than one event of cave colonization may have occurred among *T. sandovali* and its close relatives. Because multiple cave populations exist in the Santander karst region that remain unstudied, additional work has the potential to reveal other examples of convergence associated with cave living. Our phylogeny is generally congruent with trees based on thousands of loci and a

broader taxonomic sampling (Ochoa *et al.* 2017, 2020). Nevertheless, greater taxonomic and geographic sampling in future analyses should be coupled with sequencing genome-wide markers to obtain more robust inferences of phylogeny and test alternative demographic scenarios to account for the origin and phenotypic diversification of cave-living populations in the group.

We are intrigued by our finding of individuals with homogeneously dark pigmentation differing from other individuals in the same surface stream exhibiting a spotted pigmentation pattern. A potential explanation is that homogeneously pigmented individuals might be the result of re-colonizations of the surface environment from caves. Because cave-dweller populations are uniformly depigmented, individuals recolonizing the surface may have recovered dark pigmentation yet not in a spotted pattern likely lost following cave invasion. Although this scenario is speculative and would need to be tested, we note that cave fish may be common exceptions to Dollo's law (Collin & Miglietta, 2008), which argues that once a complex trait is lost it is unlikely to be re-acquired. Although cave-dwellers have been considered evolutionary 'dead-ends' (Stern *et al.*, 2017) owing to their specialization to underground life, involving the loss of eyes and pigmentation, evidence from several lineages of organisms adapted to caves, including fish (Dillman *et al.*, 2011), scorpions (Prendini *et al.*, 2010) and amphipods (Copilaş-Ciocianu *et al.*, 2018), indicates that reacquisition of surface phenotypes upon recolonization from caves is indeed possible.

To conclude, we have shown that trichomycterids from Santander have experienced convergent evolution as a likely consequence of repeated colonization of cave environments and that such convergence may have occurred in the face of gene flow and within a relatively restricted geographic area. More broadly, our study has barely scratched the surface of what we anticipate to be a promising system to address many questions about the evolutionary, ecological and developmental processes leading to the divergent phenotypes that characterize cave-living.

#### ACKNOWLEDGEMENTS

We are grateful to Yuranis Miranda, Alexandra Jiménez, Nataly Pimiento, Gerardo Bárcenas, Francisco Bautista, Diego González and Cinthy Jimenez for help during fieldwork, to Jorge Avendaño and Catalina Palacios for collaboration during lab work and to Juan Gabriel Albornoz for support when visiting the IAvH-P collection. Moreover, we acknowledge the years of efforts of researchers that have been exploring the cave system of Santander, succumbing in awe to

the beauty of the caves and the intriguing nature of their fauna. This project would have not been possible for JSF without the years of the constant support from Graciela Flórez Villamizar; his efforts are dedicated to her. MT remembers that Javier Peña was the first to point out those little white and eyeless fish to him when jointly exploring the Cueva del Nitro, Zapatoca, in the 1990s. Photographs by the authors were complemented with others by Felipe Villegas-Instituto Humboldt, César Castellanos and DoNascimento *et al.* (2014), as indicated in the figure captions. We are grateful for their contributions. Maily González, Paola Pulido-Santacruz and Eduardo Tovar-Luque collaborated during field and lab work and provided sequences of *Trichomycterus* previously deposited in the tissue collection of Instituto Humboldt (IAvH-CT). This research was supported by Fundación Iguaque, Departamento de Ciencias Biológicas at Universidad de los Andes, and Santander Bio (Sistema General de Regalías, administered by the Departamento Nacional de Planeación (BPIN 2017000100046, executed by the Gobernación de Santander and operated by the Instituto de Investigación de Recursos Biológicos Alexander von Humboldt and the Universidad Industrial de Santander). Specimens were collected under permits issued by ANLA (Resolution 004 of 2015) and by the Instituto de Investigación de Recursos Biológicos Alexander von Humboldt (Decree 1376 of 2013).

## REFERENCES

- Albert JS, Reis RE, eds. 2011.** *Historical biogeography of Neotropical freshwater fishes*. Berkeley: University of California Press.
- Ardila-Rodríguez CA. 2006.** *Trichomycterus sandovali*, (Siluriformes, Trichomycteridae) una nueva especie de pez cavernícola para el Departamento de Santander-Colombia. *Peces del Departamento de Santander* **2**: 1–16.
- Ardila-Rodríguez CA. 2007.** *Trichomycterus ruitoquensis*, (Siluriformes, Trichomycteridae) una nueva especie de pez de la cuenca alta del Río Lebríja, Departamento de Santander, Colombia. *Peces del Departamento de Santander* **3**: 1–16.
- Ardila-Rodríguez CA. 2018.** *Trichomycterus guacamayoensis* sp. nov. (Siluriformes, Trichomycteridae) una nueva especie de pez del Río Suárez, cuenca media del Río Magdalena Departamento de Santander – Colombia. *Peces del Departamento de Santander* **11**: 1–20.
- Arnedo MA, Oromí P, Múrria C, Macías-Hernández N, Ribera C. 2008.** The dark side of an island radiation: systematics and evolution of troglobitic spiders of the genus *Dysdera* Latreille (Araneae: Dysderidae) in the Canary Islands. *Invertebrate Systematics* **21**: 623–660.
- Banta AM. 1921.** An eyeless Daphnid, with remarks on the possible origin of eyeless cave animals. *Science* **53**(1376): 462–463.
- Barr JR, Thomas C. 1962.** The Blind Beetles of Mammoth Cave, Kentucky. *American Midland Naturalist* **68**: 278–284.
- Bichuette ME, Rizzato PP. 2012.** A new species of cave catfish from Brazil, *Trichomycterus rubbioli* sp. n., from Serra do Ramalho karstic area, São Francisco River basin, Bahia State (Siluriformes: Trichomycteridae). *Zootaxa* **3480**: 48–66.
- Bilandžija H, Hollifield B, Steck M, Meng G, Ng M, Koch AD, Gračan R, Četković H, Porter ML, Renner KJ, Jeffery WR. 2019.** Phenotypic plasticity as a mechanism of cave colonization and adaptation. *Elife* **9**: e51830 and *bioRxiv* 657460.
- Blandin P, Purser B. 2013.** Evolution and diversification of the Neotropical butterflies: insights from the biogeography and phylogeny of the genus *Morpho* Fabricius, 1807 (Nymphalidae: Morphinae), with a review of the geodynamics of South America. *Tropical Lepidoptera Research* **23**: 62–85.
- Blount ZD, Lenski RE, Losos JB. 2018.** Contingency and determinism in evolution: replaying life's tape. *Science* **362**: eaam5979.
- Borowsky R. 2018.** Cavefishes. *Current Biology* **28**: 60–64.
- Bradic M, Beerli P, García-de León FJ, Esquivel-Bobadilla S, Borowsky RL. 2012.** Gene flow and population structure in the Mexican blind cavefish complex (*Astyanax mexicanus*). *BMC Evolutionary Biology* **12**: 9.
- Campos MR. 2017.** Two new species of freshwater, cave-dwelling crabs of the genus *Neostrengeria* Pretzmann, 1965, from Colombia (Crustacea: Decapoda: Pseudothelphusidae). *Zootaxa* **4247**: 157–164.
- Cartwright RA, Schwartz RS, Merry AL, Howell MM. 2017.** The importance of selection in the evolution of blindness in cavefish. *BMC Evolutionary Biology* **17**: 45.
- Castellanos-Morales CA. 2007.** *Trichomycterus santanderensis*: a new species of troglomorphic catfish (Siluriformes, Trichomycteridae) from Colombia. *Zootaxa* **1541**: 49–55.
- Castellanos-Morales CA. 2008.** *Trichomycterus uisae*: a new species of hypogean catfish (Siluriformes: Trichomycteridae) from the northeastern Andean Cordillera of Colombia. *Neotropical Ichthyology* **6**: 307–314.
- Castellanos-Morales CA. 2010.** *Trichomycterus sketi*: a new species of subterranean catfish (Siluriformes: Trichomycteridae) from the Andean Cordillera of Colombia. *Biota Colombiana* **11**: 33–41.
- Castellanos-Morales CA. 2018.** A new species of cave catfish, genus *Trichomycterus* (Siluriformes: Trichomycteridae), from the Magdalena River system, Cordillera Oriental, Colombia. *Biota Colombiana* **19**: 117–130.
- Castellanos-Morales CA, Galvis F. 2012.** Species from the *Trichomycterus* (Siluriformes: Trichomycteridae) genus in Colombia. *Boletín Científico. Centro de Museos. Museo de Historia Natural* **16**: 194–206.
- Castellanos-Morales CA, Marino-Zamudio LL, Guerrero VL, Maldonado-Ocampo JA. 2011.** Peces del Departamento de Santander, Colombia. *Revista de la Academia Colombiana de Ciencias Exactas, Físicas y Naturales* **35**: 189–212.
- Castellanos-Morales CA, Moreno F, Malagón, LM, Arango AJ, Pardo DD, Méndez MA. 2015.** Aportes al

- conocimiento y uso de los ecosistemas subterráneos del municipio de La Paz (Santander). *Boletín Científico. Centro de Museos. Museo de Historia Natural* **19**: 173–185.
- Chamberlin JC, Malcolm DR. 1960.** The occurrence of false scorpions in caves with special reference to cavernicolous adaptation and to cave species in the North American fauna (Arachnida-Chelonethida). *The American Midland Naturalist* **64**: 105–115.
- Christiansen K. 2012.** Morphological adaptations. In: Culver DC, White WB, eds. *Encyclopedia of caves*. Amsterdam: Elsevier, 517–528.
- Collin R, Miglietta MP. 2008.** Reversing opinions on Dollo's Law. *Trends in Ecology & Evolution* **23**: 602–609.
- Copilaş-Ciocianu D, Fişer C, Borza P, Petrusek A. 2018.** Is subterranean lifestyle reversible? Independent and recent large-scale dispersal into surface waters by two species of the groundwater amphipod genus *Niphargus*. *Molecular Phylogenetics and Evolution* **119**: 37–49.
- De Filippi F. 1853.** “Nouvelles espèces de poissons”. *Revue et magasin de zoologie* **5**: 164–171.
- Dillman CB, Bergstrom DE, Noltie DB, Holtsford TP, Mayden RL. 2011.** Regressive progression, progressive regression or neither? Phylogeny and evolution of the Percopsiformes (Teleostei, Paracanthopterygii). *Zoologica Scripta* **40**: 45–60.
- DoNascimento C, Prada-Pedrerros S, Guerrero-Kommritz J. 2014.** A new catfish species of the genus *Trichomycterus* (Siluriformes: Trichomycteridae) from the río Orinoco versant of Páramo de Cruz Verde, Eastern Cordillera of Colombia. *Neotropical Ichthyology*, **12**: 717–728.
- DoNascimento C, Herrera-Collazos EE, Herrera RGA, Ortega-Lara A, Villa-Navarro FA, Usma-Oviedo JS, Maldonado-Ocampo JA. 2017.** Checklist of the freshwater fishes of Colombia: a Darwin Core alternative to the updating problem. *ZooKeys* **708**: 25–138.
- DoNascimento C, Prada-Pedrerros S. 2020.** A new troglomorphic species of *Trichomycterus* (Siluriformes: Trichomycteridae) from north-eastern Colombia, with proposal of a new *Trichomycterus* subclade and remarks on some nominal species from Colombia. *Journal of Fish Biology* **96**: 968–985.
- Dowling TE, Martasian DP, Jeffery WR. 2002.** Evidence for multiple genetic forms with similar eyeless phenotypes in the blind cavefish, *Astyanax mexicanus*. *Molecular Biology and Evolution* **19**: 446–455.
- Edgar RC. 2004.** MUSCLE: multiple sequence alignment with high accuracy and high throughput. *Nucleic Acids Research* **32**: 1792–1797.
- Eigenmann CH. 1912.** The freshwater fishes of British Guiana, including a study of the ecological groupings of species and the relation of the fauna of the plateau to that of the lowlands. *Memoirs of the Carnegie Museum* **5**: 1–103.
- Eigenmann CH. 1917.** Descriptions of Sixteen New Species of Pygidiidae. *Proceedings of the American Philosophical Society* **56**: 690–703.
- Espinasa L, Borowsky RB. 2001.** Origins and relationship of cave populations of the blind Mexican tetra, *Astyanax fasciatus*, in the Sierra de El Abra. *Environmental Biology of Fishes* **62**: 233–237.
- Espinasa L, Fisher A. 2006.** Cavernicolous species of the genus *Anelapistina* (Zygentoma: Nicoletiidae) from San Sebastian Cave, Oaxaca, Mexico. *Proceedings of the Entomological Society of Washington* **108**: 655–660.
- Fricke R, Eschmeyer WN, Van der Laan R, eds. 2020.** *Eschmeyer's catalog of fishes: genera, species, references*. Available at: <http://researcharchive.calacademy.org/research/ichthyology/catalog/fishcatmain.asp> (accessed 28 December 2019).
- Gaona-Narváez T. 2015.** El Cretácico sedimentario al este de la Falla de San Jerónimo: Compilación para el Mapa Geológico de Colombia. In: Gómez-Tapia J, Almanza-Meléndez, MF, eds. Bogotá: Servicio Geológico Colombiano, Publicaciones Geológicas Especiales.
- Gómez-Tapia J, Montes-Ramírez NE, Nivia-Guevara Á, Diederix H, eds. 2015.** *Mapa Geológico de Colombia 2015. Escala 1:1000000*. Bogotá: Servicio Geológico Colombiano.
- Gore AV, Tomins KA, Iben J, Ma L, Castranova D, Davis AE, Parkhurst A, Jeffery WR, Weinstein BM. 2018.** An epigenetic mechanism for cavefish eye degeneration. *Nature Ecology & Evolution* **2**: 1155–1160.
- Gross JB. 2012.** The complex origin of *Astyanax* cavefish. *BMC Evolutionary Biology* **12**: 105.
- Gross JB, Meyer B, Perkins M. 2015.** The rise of *Astyanax* cavefish. *Developmental Dynamics* **244**: 1031–1038.
- Hart PB, Niemiller ML, Burress ED, Armbruster JW, Ludt WB, Chakrabarty P. 2020.** Cave-adapted evolution in the North American amblyopsid fishes inferred using phylogenomics and geometric morphometrics. *Evolution* **74**: 936–949.
- Hebert PD, Cywinska A, Ball SL, deWaard JR. 2003.** Biological identifications through DNA barcodes. *Proceedings. Biological sciences* **270**: 313–321.
- Herman A, Brandvain Y, Weagley J, Jeffery WR, Keene AC, Kono TJY, Bilandžija H, Borowsky R, Espinasa L, O'Quin K, Ornelas-García CP, Yoshizawa M, Carlson B, Maldonado E, Gross JB, Cartwright RA, Rohner N, Warren WC, McGaugh SE. 2018.** The role of gene flow in rapid and repeated evolution of cave-related traits in Mexican tetra, *Astyanax mexicanus*. *Molecular Ecology* **27**: 4397–4416.
- Hoorn C, Wesselingh FP, ter Steege H, Bermudez MA, Mora A, Sevink J, Sanmartín I, Sanchez-Meseguer A, Anderson CL, Figueiredo JP, Jaramillo C, Riff D, Negri FR, Hooghiemstra H, Lundberg J, Stadler T, Särkinen T, Antonelli A. 2010.** Amazonia through time: Andean uplift, climate change, landscape evolution, and biodiversity. *Science* **330**: 927–931.
- Horton BK, Parra M, Mora, A. 2020.** Construction of the eastern Cordillera of Colombia: insights from the sedimentary record. In: Gómez J, Mateus-Zabala D, eds. *The geology of Colombia Volume 3 Paleogene-Neogene 37*. Bogotá: Servicio Geológico Colombiano, Publicaciones Geológicas Especiales, 22. Doi: [10.32685/pub.esp.37.2019.03](https://doi.org/10.32685/pub.esp.37.2019.03).
- Huelsenbeck JP, Ronquist F. 2001.** MRBAYES: Bayesian inference of phylogenetic trees. *Bioinformatics* **17**: 754–755.



- Jeffery WR. 2001.** Cavefish as a model system in evolutionary developmental biology. *Developmental Biology* **231**: 1–12.
- Jeffery WR. 2009.** Chapter 8. Evolution and development in the cavefish *Astyanax*. *Current Topics in Developmental Biology* **86**: 191–221.
- Juan C, Guzik MT, Jaime D, Cooper SJ. 2010.** Evolution in caves: Darwin's 'wrecks of ancient life' in the molecular era. *Molecular Ecology* **19**: 3865–3880.
- Katz AM, Barbosa MA, Mattos JLO, Costa WJEM. 2018.** Multigene analysis of the catfish genus *Trichomycterus* and description of a new South American trichomycterine genus (Siluriformes, Trichomycteridae). *Zoosystematics and Evolution* **94**: 557–566.
- Kay RF, Madden RH. 1997.** Mammals and rainfall: paleoecology of the middle Miocene at La Venta (Colombia, South America). *Journal of Human Evolution* **32**: 161–199.
- Kearse M, Moir R, Wilson A, Stones-Havas S, Cheung M, Sturrock S, Buxton S, Cooper A, Markowitz S, Duran C, Thierer T, Ashton B, Meintjes P, Drummond A. 2012.** Geneious Basic: an integrated and extendable desktop software platform for the organization and analysis of sequence data. *Bioinformatics* **28**: 1647–1649.
- Kirchner S, Sattmann H, Haring E, Plan L, Victor R, Kruckenhauser L. 2017.** Investigating gene flow between the blind cavefish *Garra barreimiae* and its conspecific surface populations. *Scientific Reports* **7**: 5130.
- Kowalko JE, Rohner N, Rompani SB, Peterson BK, Linden TA, Yoshizawa M, Kay EH, Weber J, Hoekstra HE, Jeffery WR, Borowsky R, Tabin CJ. 2013.** Loss of schooling behavior in cavefish through sight-dependent and sight-independent mechanisms. *Current Biology* **23**: 1874–1883.
- Krishnan J, Rohner N. 2017.** Cavefish and the basis for eye loss. *Philosophical Transactions of the Royal Society B: Biological Sciences* **372**: 20150487.
- Lanfear R, Calcott B, Ho SY, Guindon S. 2012.** Partitionfinder: combined selection of partitioning schemes and substitution models for phylogenetic analyses. *Molecular Biology and Evolution* **29**: 1695–1701.
- Lasso CA, Barriga JC, Fernández-Auderset J, eds. 2019.** Volumen VII. *Biodiversidad subterránea y epigea de los sistemas cársticos de El Peñón (Andes), Santander, Colombia. Serie Editorial Fauna Silvestre Neotropical*. Bogotá: Instituto de Investigación de Recursos Biológicos Alexander von Humboldt.
- Leigh JW, Bryant D. 2015.** PopArt: full-feature software for haplotype network construction. *Methods in Ecology and Evolution* **6**: 1110–1116.
- Losos JB. 2017.** *Improbable destinies. Fate, chance, and the future of evolution*. New York: Riverhead Books.
- Lourenço WR, Pham DS. 2010.** A remarkable new cave scorpion of the family Pseudochactidae Gromov (Chelicerata, Scorpiones) from Vietnam. *ZooKeys* **71**: 1–13.
- Meek SE, Hildebrand SF. 1913.** New species of fishes from Panama. *Field Museum of Natural History* **10**: 77–91.
- Mendoza JE, Murillo JMM, Orjuela GR. 2009.** Sistema cárstico de la Formación Rosablanca Cretácico inferior, en la provincia santandereana de Vélez, Colombia. *Geología Colombiana* **34**: 35–44.
- Mesa S, Lasso CA, Ochoa LE, DoNascimento, C. 2018.** *Trichomycterus rosablanca* (Siluriformes, Trichomycteridae) a new species of hipogean catfish from the Colombian Andes. *Biota Colombiana* **19**: 95–116.
- Messana G, Baratti M, Benvenuti D. 2002.** *Pongycarcinia xiphidiourus* n. gen. n. sp., a new Brazilian Calabozoidae (Crustacea Isopoda). *Tropical Zoology* **15**: 243–252.
- Moran D, Softley R, Warrant EJ. 2015.** The energetic cost of vision and the evolution of eyeless Mexican cavefish. *Science Advances* **1**: e1500363.
- Muñoz-Saba Y, González-Sánchez I, Calvo-Roa N, eds. 2013.** *Cavernas de Santander, Colombia: guía de campo*. Bogotá: Universidad Nacional de Colombia.
- Niemiller ML, Fitzpatrick BM, Miller BT. 2008.** Recent divergence with gene flow in Tennessee cave salamanders (Plethodontidae: *Gyrinophilus*) inferred from gene genealogies. *Molecular Ecology* **17**: 2258–2275.
- Niemiller ML, Bichuette ME, Chakrabarty P, Fenolio DB, Gluesenkamp AG, Soares D, Zhao Y. 2019.** Cavefishes. In: White WB, Culver DC, Pipan T, eds. *Encyclopedia of caves, 3rd edn*. Cambridge: Academic Press, 227–236.
- Ochoa LE, Roxo FF, DoNascimento C, Sabaj MH, Datovo A, Alfaro M, Oliveira C. 2017.** Multilocus analysis of the catfish family Trichomycteridae (Teleostei: Ostariophysi: Siluriformes) supporting a monophyletic Trichomycterinae. *Molecular Phylogenetics and Evolution* **115**: 71–81.
- Ochoa LE, Datovo A, DoNascimento C, Roxo FF, Sabaj MH, Chang J, Melo BF, Silva GSC, Foresti F, Alfaro M, Oliveira C. 2020.** Phylogenomic analysis of trichomycterid catfishes (Teleostei: Siluriformes) inferred from ultraconserved elements. *Scientific Reports* **10**: 2697.
- Prendini L, Francke OF, Vignoli V. 2010.** Troglomorphism, trichobothriotaxy and typhlochactid phylogeny (Scorpiones, Chactoidae): more evidence that troglotism is not an evolutionary dead-end. *Cladistics* **26**: 117–142.
- Protas ME, Trontelj P, Patel NH. 2011.** Genetic basis of eye and pigment loss in the cave crustacean, *Asellus aquaticus*. *Proceedings of the National Academy of Sciences* **108**: 5702–5707.
- Proudlove GS. 2010.** Biodiversity and distribution of the subterranean fishes of the world. In: Trajano E, Bichuette ME, Kapoor BG, eds. *Biology of subterranean fishes*. Boca Raton: CRC Press, 41–63.
- R Development Core and Team 2018.** R: a language and environment for statistical computing. *R Foundation for Statistical Computing*. Vienna. Available at: <https://www.R-project.org/>
- Rambaut A, Drummond AJ, Xie D, Baele G, Suchard MA. 2018.** Posterior summarization in Bayesian phylogenetics using Tracer 1.7. *Systematic Biology* **67**: 901–904.
- Riddle MR, Aspiras AC, Gaudenz K, Peuß R, Sung JY, Martineau B, Peavey M, Box AC, Tabin JA, McGaugh S, Borowsky R, Tabin CJ, Rohner N. 2018.** Insulin



- resistance in cavefish as an adaptation to a nutrient-limited environment. *Nature* **555**: 647–651.
- Rohner N, Jarosz DF, Kowalko JE, Yoshizawa M, Jeffery WR, Borowsky RL, Lindquist S, Tabin CJ. 2013.** Cryptic variation in morphological evolution: HSP90 as a capacitor for loss of eyes in cavefish. *Science* **342**: 1372–1375.
- Romero A. 2011.** The evolution of cave life. *American Scientist* **99**: 144–155.
- Schliep KP. 2011.** Phangorn: phylogenetic analysis in R. *Bioinformatics* **27**: 592–593.
- Shimodaira H. 2002.** An approximately unbiased test of phylogenetic tree selection. *Systematic Biology* **51**: 492–508.
- Stamatakis A. 2014.** RAxML version 8: a tool for phylogenetic analysis and post-analysis of large phylogenies. *Bioinformatics* **30**: 1312–1313.
- Stern DB, Breinholt J, Pedraza-Lara C, López-Mejía M, Owen CL, Bracken-Grissom H, Fetzner JW Jr, Crandall KA. 2017.** Phylogenetic evidence from freshwater crayfishes that cave adaptation is not an evolutionary dead-end. *Evolution* **71**: 2522–2532.
- Torres M, Quiñones C, eds. 2019.** *Santander Bio: resultados, retos y oportunidades*. Bogotá: Instituto de Investigación de Recursos Biológicos Alexander von Humboldt.
- Vidlička L, Vršanský P, Shcherbakov DE. 2003.** Two new troglitic cockroach species of the genus *spelaeoblatta* (blattaria: nocticolidae) from north thailand. *Journal of Natural History* **37**: 107–114.
- Villarreal O, García AF. 2016.** Unveiling the diversity of Phalangodus Gervais, 1842 (Opiliones: Cranidae): descriptions of four new species from Colombia. *European Journal of Taxonomy* **242**: 1–41.
- Ward RD, Hanner R, Hebert PD. 2009.** The campaign to DNA barcode all fishes, FISH-BOL. *Journal of Fish Biology* **74**: 329–356.
- Ward RW, Zemlak TS, Innes BH, Last PR, Hebert PDN. 2005.** DNA barcoding Australia's fish species. *Philosophical Transactions of the Royal Society of London B: Biological Sciences* **360**: 1847–1857.
- Wasko AP, Martins C, Oliveira C, Foresti F. 2003.** Non-destructive genetic sampling in fish. An improved method for DNA extraction from fish fins and scales. *Hereditas* **138**: 161–165.
- Wiens JJ, Chippindale PT, Hillis DM. 2003.** When are phylogenetic analyses misled by convergence? A case study in Texas cave salamanders. *Systematic Biology* **52**: 501–514.
- Wilkens H. 2020.** The role of selection in the evolution of blindness in cave fish. *Biological Journal of the Linnean Society* **130**: 421–432.
- Yoshizawa M, Goricki S, Soares D, Jeffery WR. 2010.** Evolution of a behavioral shift mediated by superficial neuromasts helps cavefish find food in darkness. *Current Biology* **20**: 1631–1636.

## SUPPORTING INFORMATION

Additional Supporting Information may be found in the online version of this article at the publisher's web-site.

**Figure S1.** Bayesian gene tree of *Trichomycterus* and other genera based on sequences of the *COI* gene. Branch length proportional to genetic divergence and node support indicated.

**Figure S2.** ML gene tree of *Trichomycterus* and other genera based on sequences of the *COI* gene. Branch length proportional to genetic divergence and node support indicated.
